# Supplementary material for: Integrated genome and transcriptome analyses reveal the mechanism of genome instability in ataxia with oculomotor apraxia 2
Source: PubMed Central journal article supplement (PMC8795503; doi:10.1073/pnas.2114314119), 2022-01-18
Supplement: pnas.2114314119.sapp.pdf [file pnas.2114314119.sapp.pdf]

# Supplementary information

## Appendix 1

### Contents:

SI Appendix 1, Figures S1 – S7

Supplementary Methods and Data Analyses

SI Appendix 1, Table S1

SI Appendix 1, Datasets S1-S8 are .xis files and are not contained within this document

SI Appendix 1, Movies 1 and 2 are .mov files and are not contained within this document

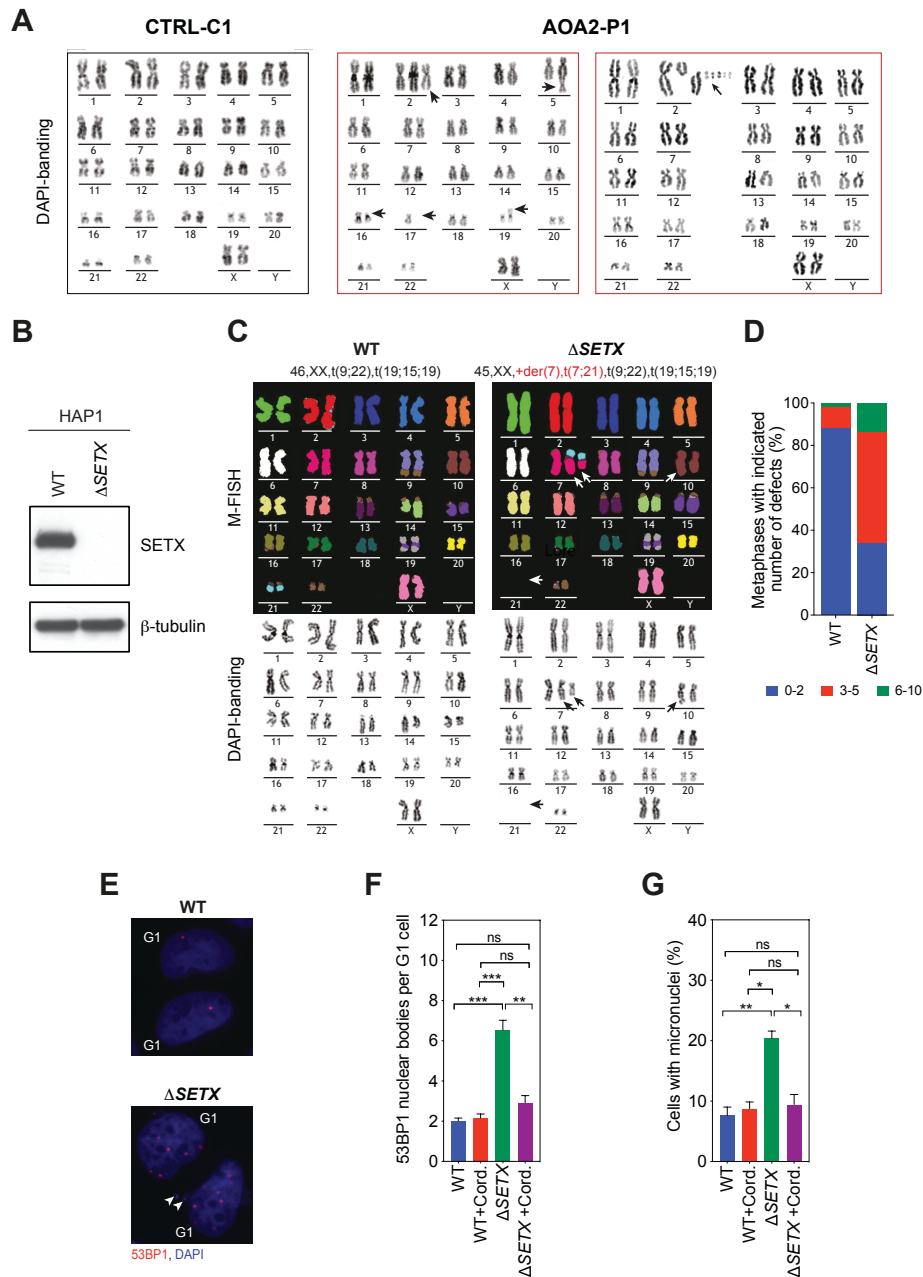

**Fig. S1.** SETX deficiency promotes chromosome fragility.

(A) DAPI-banding (gray-scale) images of M-FISH karyotypes shown in Fig 1F. Black arrows indicate chromosome aberrations.

(B) Western blot analysis of HAP1 WT and  $\Delta$ SETX cells made by CRISPR/Cas9-mediated gene targeting.  $\beta$ -tubulin, loading control.

(C) M-FISH and DAPI-banding of metaphase spreads from HAP1 WT and  $\Delta$ SETX cells showing deletions, translocations and chromosome fragility. Representative karyotypes are shown. Arrows indicate chromosome aberrations.

(D) Quantification of metaphases with indicated number of aberrations, as in (C). 30 metaphases were analyzed per condition.

(E) Immunostaining of HAP1 WT and  $\Delta SETX$  cells with 53BP1 (red) antibody. Nuclear DNA was stained with DAPI (blue). Representative images of G1-phase cells are shown. White arrowheads indicate micronuclei.

(F) Quantification of 53BP1 nuclear bodies in G1 cells, as in (E). Cells were treated with or without cordycepin.

(G) Quantification of cells with indicated number of micronuclei, as in (E). Cells were treated with or without cordycepin.

Data are representative of three independent experiments. \* $P < 0.05$ , \*\* $P < 0.01$  and \*\*\* $P < 0.001$  by Mann-Whitney test.  $P \geq 0.05$  is considered not significant (ns). Error bars represent s.e.m.

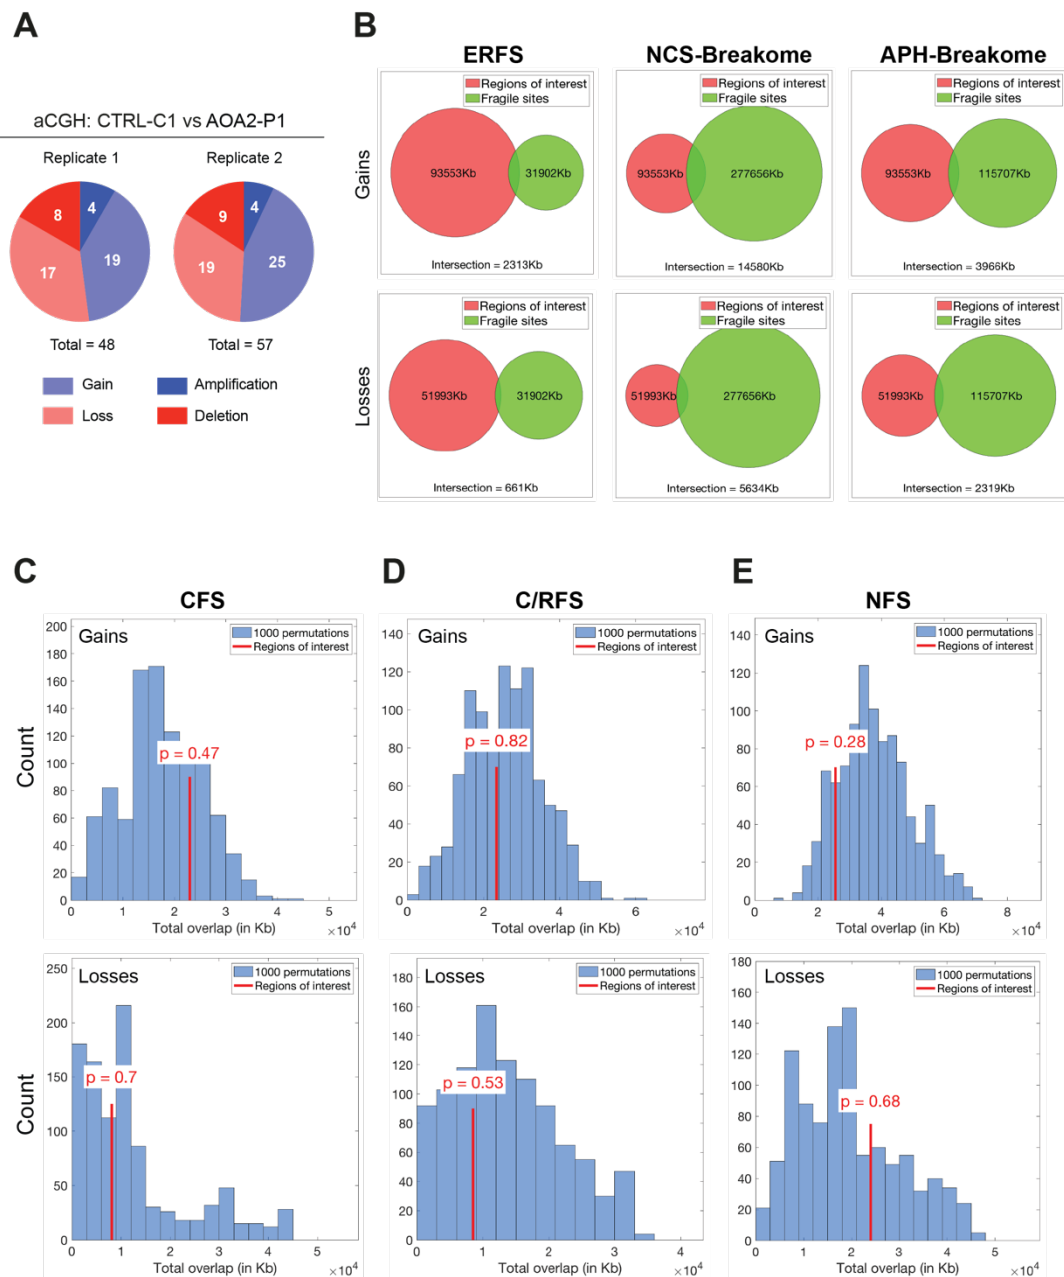

**Fig. S2.** Overlap analysis of CNCs identified in AOA2-P1 fibroblasts by array CGH.

(A) Pie chart representations of CNCs identified in the aCGH experiments described in Fig. 2A and B. Data from two independent experiments (replicates 1 and 2) are shown.

(B) Venn diagram of AOA2-P1 fibroblast gain or loss regions (red) and fragile sites (green) as in Fig 2C-E. Total genomic area and intersected area are reported.

(C) Top: Histogram showing overlaps between 1000 permuted AOA2-P1 fibroblast gain regions with CFSs. Bottom: Overlaps between 1000 permuted AOA2-P1 fibroblast loss regions with CFSs. Red line indicates the degree of overlap (in kb). P values for the overlap compared to permutations are indicated, with  $P < 0.05$  considered a significant enrichment/depletion.

(D) As (C) showing the overlaps between AOA2-P1 fibroblast gain and loss regions with the C/RFS.

(E) As (C) showing the overlaps between AOA2-P1 fibroblast gain and loss regions with the NFS.

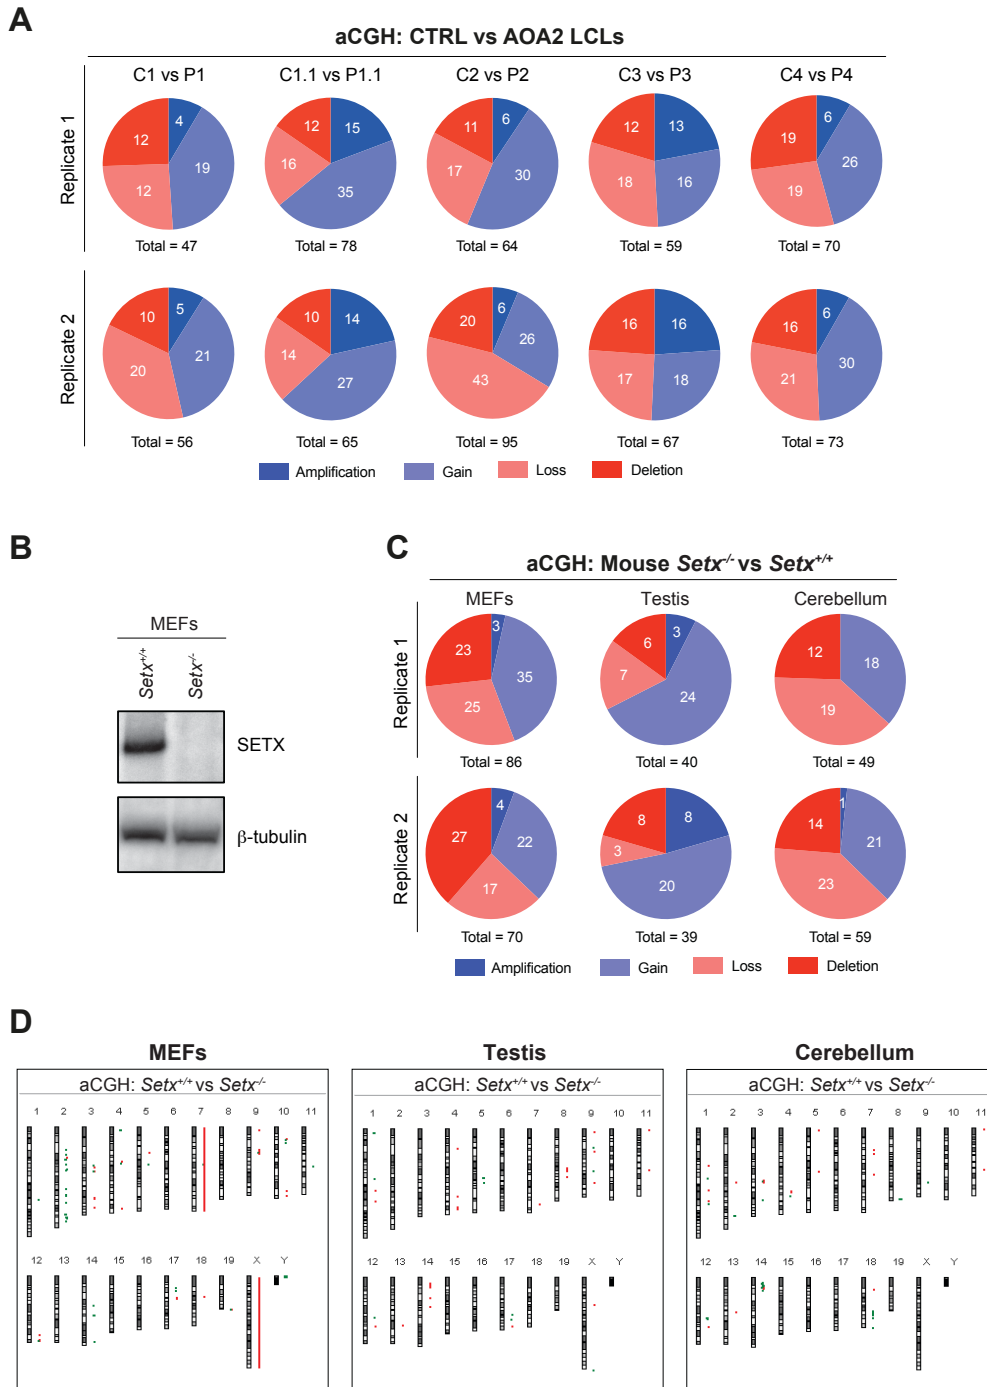

**Fig. S3.** Genomic aberrations associated with AOA2 LCLs and mouse *Setx* k/o. (A) Pie chart representations of CNVs detected in two independent aCGH experiments (replicates 1 and 2) with genomic DNA from control (C1-C4 and C1.1) and AOA2 (P1-P4 and P1.1) LCLs. (B) Western blot analysis of *Setx*<sup>+/+</sup> and *Setx*<sup>-/-</sup> MEFs.  $\beta$ -tubulin, loading control. (C) As (A) but with genomic DNA from *Setx*<sup>+/+</sup> and *Setx*<sup>-/-</sup> MEFs, testis and cerebellum. (D) Ideograms indicating the chromosomal locations of CNVs. Regions of gain and loss are indicated with red and green bars, respectively.

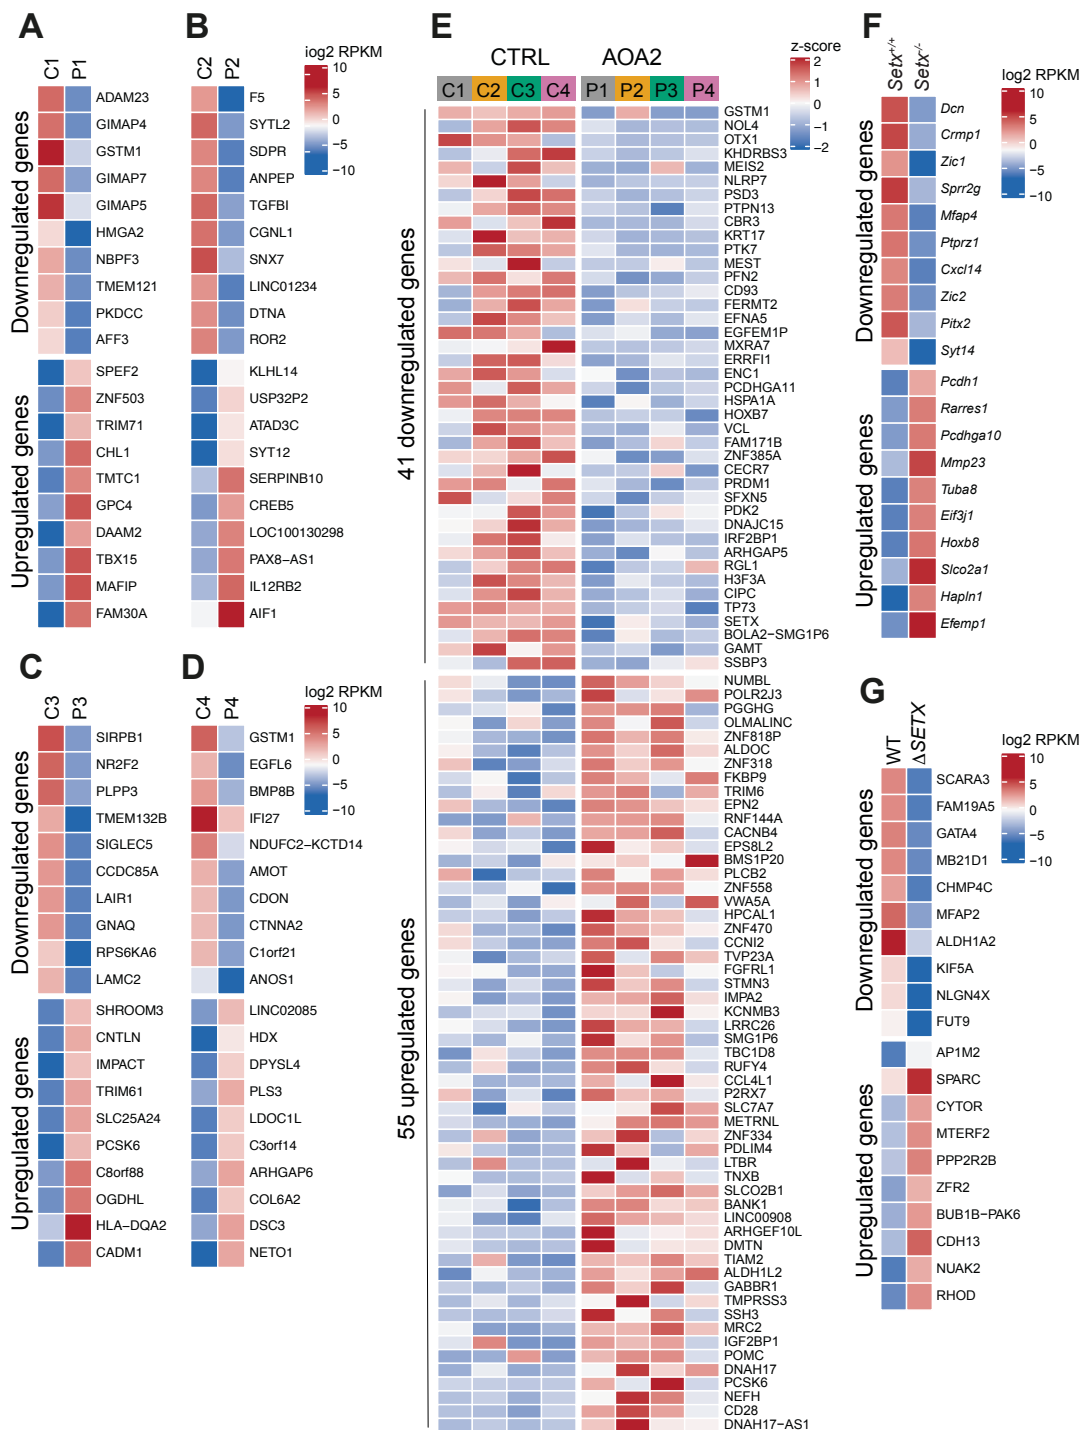

**Fig. S4.** Differentially expressed genes identified in *SETX*-deficient human and mouse cells. (A) Heatmap of gene expression abundance across P1 and C1 LCLs. The top 10 most downregulated and 10 most upregulated genes, based on a fold change of normalized read count, are shown. Data are presented as  $\log_2(\text{RPKM}+0.01)$ . (B) As (A), using RNA-seq analyses from C2 and P2 LCLs. (C) As (A), using RNA-seq analyses from C3 and P3 LCLs. (D) As (A), using RNA-seq analyses from C4 and P4 LCLs. (E) Heatmap of gene expression abundance, highlighting differences in expression between AOA2 and paired control LCLs from DESeq2 analysis ( $\text{FDR} \leq 0.05$ ). All the downregulated (41) and upregulated (55) genes based on fold change are presented. Data are rlog transformed

to stabilize variance and normalize with respect to library size, then scaled per-gene using a z-score.

(F) As (A), using RNA-seq analyses from *Setx*<sup>+/+</sup> and *Setx*<sup>-/-</sup> mouse MEFs.

(G) As (A), using RNA-seq analyses from HAP1 WT and  $\Delta$ *SETX* cells.

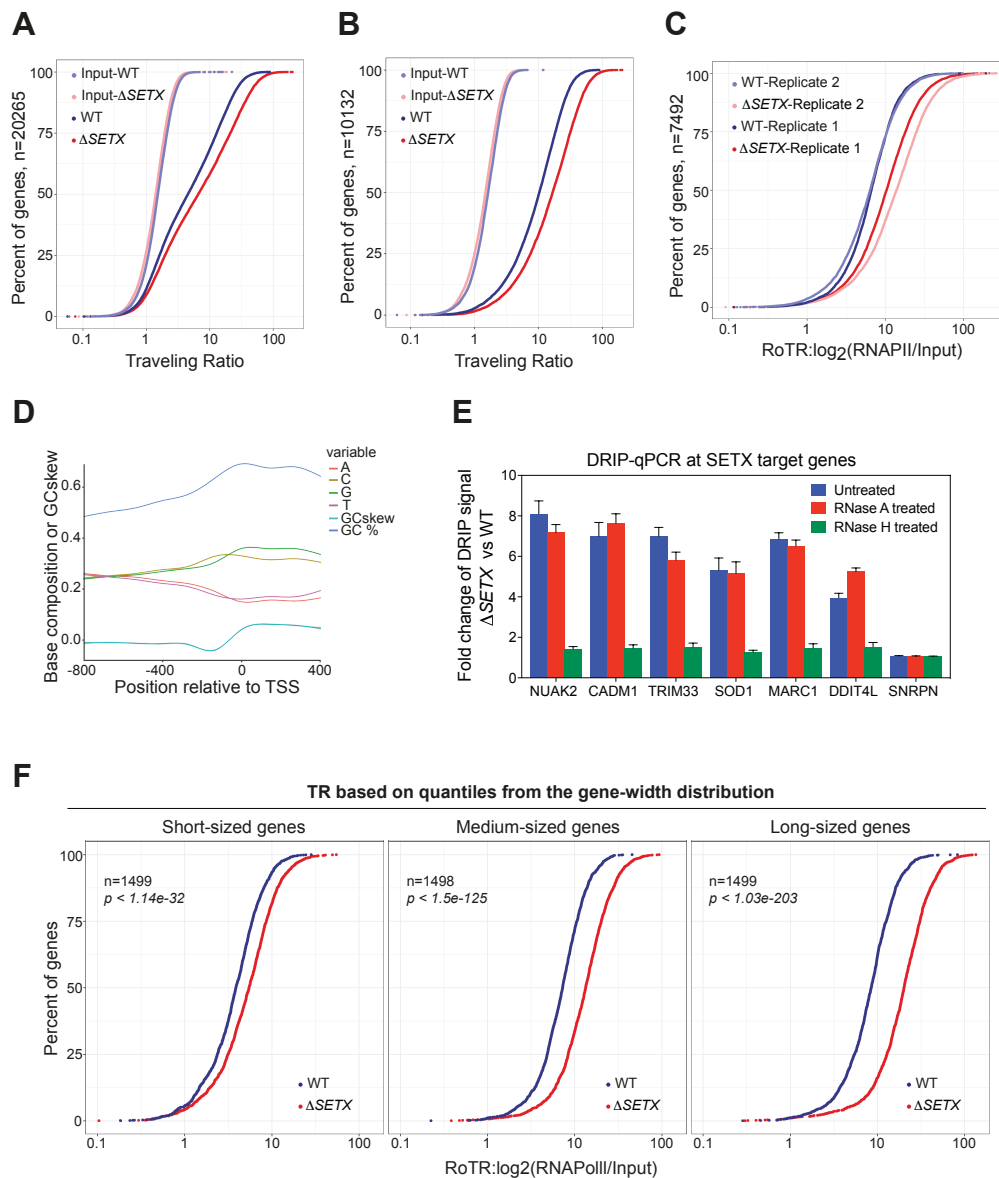

**Fig. S5.** Transcription stress analysis in HAP1 WT and  $\Delta$ SETX cells.

(A) RNAPII traveling ratio (TR) distribution of all genes (n=20265) in HAP1 WT and  $\Delta$ SETX cells, along with input controls. The y-axis indicates percent of all genes. Higher TR values indicate a higher degree of RNAPII pausing.

(B) As (A), except TR was analyzed only for genes with RNAPII peak over TSS (n=10132).

(C) As Fig 4C, except that cumulative curves of RNAPII RoTR from two independent ChIP-seq experiments are shown.

(D) Nucleotide frequencies in the [-800, +400] region around the TSS of 7492 genes identified in the RoTR analysis. GC skew and GC content (GC%) in the region are shown.

(E) DRIP-qPCR assays were carried out using HAP1 WT and  $\Delta$ SETX cells, either untreated or treated with RNase A or RNase H. The SETX-target gene promoter and negative control (SNRPN) regions were analyzed. Data represent the mean  $\pm$  s.e.m of three independent experiments.

(F) As Fig 4E, except that Ensembl genes are stratified into short/medium/long groupings based on the quantiles from the gene-width distributions. 'short' = shortest 20%, 'medium' = middle 40-60% of widths and 'long' = longest 20%.



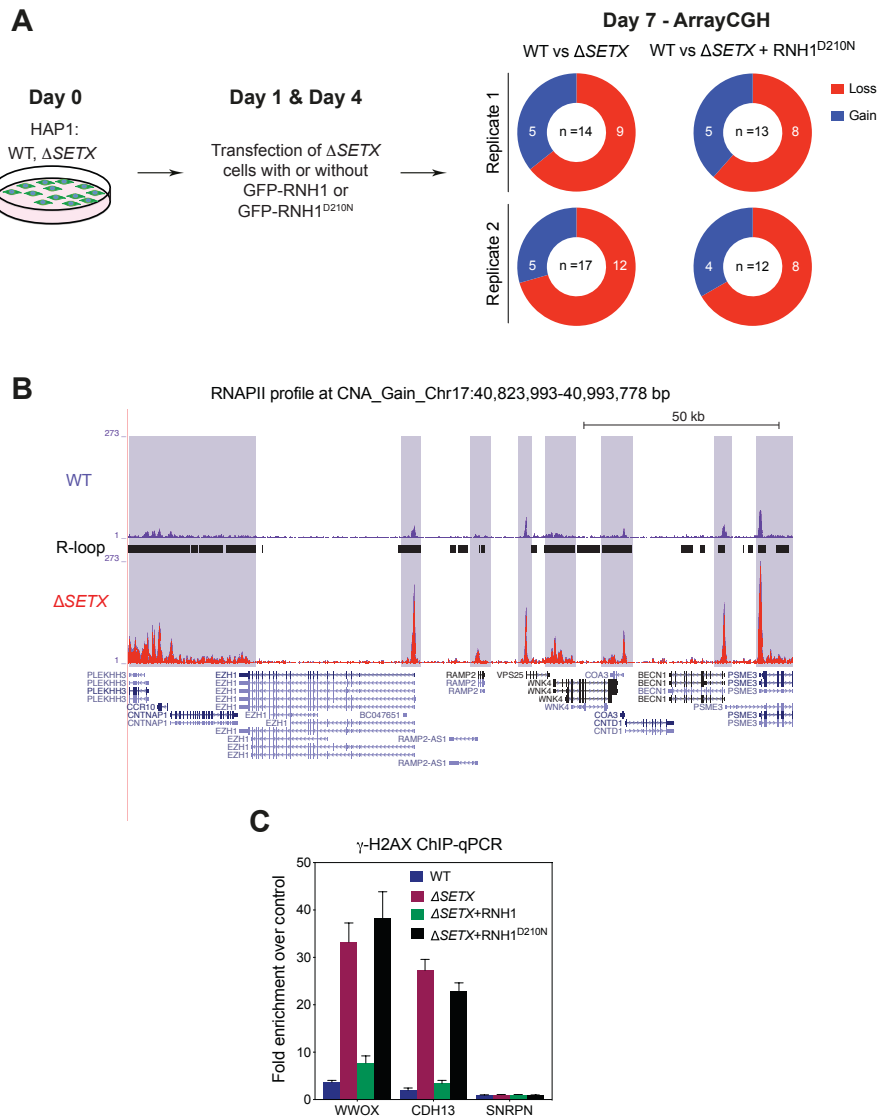

**Fig. S6.** Transcription stress causes chromosome instability in the absence of SETX.

(A) Schematic of aCGH experiments carried out with HAP1 WT and  $\Delta$ SETX cells. On day 1 and day 4 post seeding,  $\Delta$ SETX cells were transfected with or without GFP-RNaseH1 (RNH1) or GFP-RNH1<sup>D210N</sup>. On day 7, aCGH was performed with WT vs WT, WT vs  $\Delta$ SETX, WT vs  $\Delta$ SETX + RNH1 and WT vs  $\Delta$ SETX + RNH1<sup>D210N</sup>. Donut chart representations of CNCs identified in the aCGH experiments described in Fig 5A and D. Data from two independent experiments (replicates 1 and 2) are shown.

(B) Representative genome browser screenshot of RNAPII pausing over the indicated genomic region that is amplified in  $\Delta$ SETX (red) compared to WT (blue) cells. R-loops are shown in black. All genes in the region are shown below. Scale bar, 50kb.

(C) ChIP-qPCR analyses at *WWOX*, *CDH13* and *SNRPN* (negative control) genes using a  $\gamma$ -H2AX antibody was carried out with cross-linked chromatin from HAP1 WT and  $\Delta$ SETX cells. Fold enrichment was calculated as a ratio of  $\gamma$ -H2AX antibody signal versus control IgG. Data represent the mean  $\pm$  s.e.m of three independent experiments.

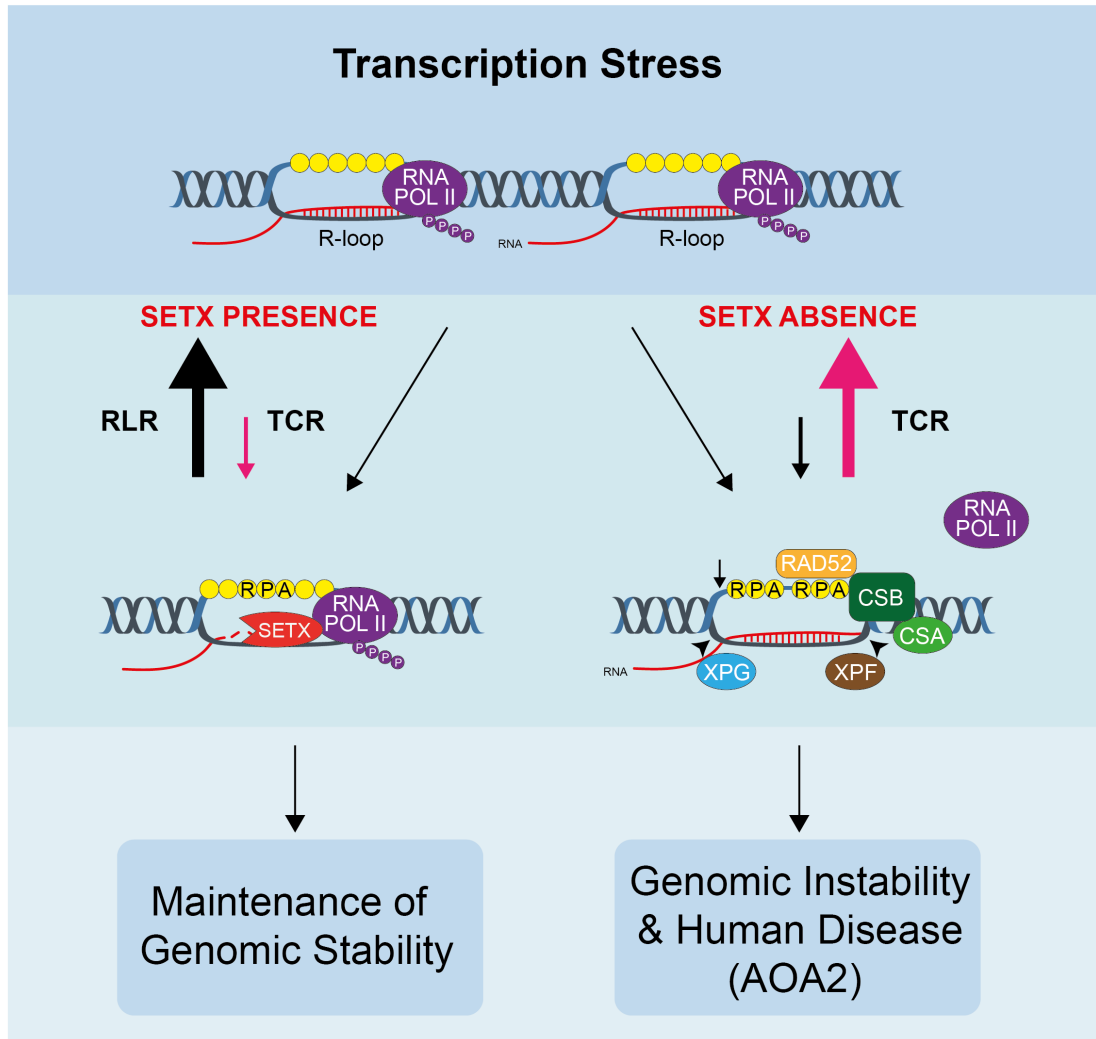

**Fig. S7.** Model for the role of Senataxin in response to transcription stress (RNAPII pausing, ROS damage).

Senataxin facilitates R-loop repair (RLR) by promoting the removal of R-loops at transcription sites, particularly near regions of RNAPII pausing, and thereby protects against genome stability. In the absence of SETX, CSB recognizes stalled RNAPII and transcription-coupled repair (TCR) proteins/recombination factors (e.g. RAD52) are recruited to resolve and repair transcription bubbles containing R-loops, but at the expense of faithful maintenance of the genome.

## **Appendix 1, Supplementary Methods & Data Analyses**

**Quantification and statistical analysis.** Statistical details of experiments, including statistical tests, number of events quantified, standard deviation, standard error of the mean, and statistical significance, are reported in the figures and figure legends. GraphPad Prism7 or 8 software (GraphPad) was used for the statistical analyses of cell biology experiments.

**Analysis of array comparative genomic hybridization data.** Data extraction, analysis and visualization were performed using Agilent Cytogenomics 2.7.11.0 software for human samples or the Agilent Feature Extraction 12.0.0.7 and Agilent Genomic Workbench 7.0.4.0 software for mouse samples (Agilent Technologies). Analysis settings were as follows: genome, hg19 (human) or mm9 (mouse); aberration algorithm, ADM-2; threshold: 6.0; window size, 2 kb; aberration filter,  $\geq 3$  probes and  $\log_2\text{ratio} \geq 0.25$ . The following  $\log_2\text{ratio}$  were used to score the aberrations: Amplification,  $\log_2\text{ratio} \geq 2$ ; Gain,  $\log_2\text{ratio}$  between 0.25 to 2; Loss,  $\log_2\text{ratio}$  between -0.25 to -1; Deletion,  $\log_2\text{ratio} \leq 1$ .

**GREAT analysis.** Genomic Regions Enrichment of Annotations Tool (GREAT) was performed as described (1).

**Analysis of gene expression data.** Affymetrix gene expression data were analysed using Bioconductor 2.5 (<https://www.bioconductor.org>) running on R version 2.10.0 (2). Probeset expression measures were calculated using the Robust Multichip Average (RMA) method with the oligo package (3, 4). Differential gene expression was assessed between AOA2 and control sample groups using an empirical Bayes t-test (limma package) (5). p-values were adjusted for multiple testing correction using the Benjamini-Hochberg method (6). Probesets that exhibited an adjusted p-value of 0.05 or less were called differentially expressed. Differentially expressed probes were used to determine pathway and biological process enrichment using the Clarivate Analytics Metacore pathway analysis tool. Pathways or processes that showed  $\text{FDR} < 0.05$  were called as enriched.

**Circos plots.** The Bioconductor package ggbio was used to construct the circos plots (7). The genomic locations of Aphidicolin Sensitive breakome Regions (ASR), Common Fragile Sites (CFS), Common and Rare Fragile Sites (CRFS), Early Replicating Fragile Sites (ERFS) and Neocarzinostatin Sensitive breakome Regions (NSR) were described previously (8-12). The RDC genes were described previously (13, 14).

**Alignment and quantification of mRNA-seq data.** Reads were aligned either against hg19 (human) or mm9 (mouse) and their respective Refseq annotations using STAR v2.5.1b (15) via the transcript quantification software RSEM v1.2.31 (16). The resulting genome alignment BAM files were sorted and indexed using SAMtools 1.3.1 (17). Duplicate reads were marked using Picard 2.1.1 (<http://broadinstitute.github.io/picard>). The resulting gene-level estimated read counts

were rounded to integers and further analyzed for differential expression using the Bioconductor package DESeq2 1.12.3 (18).

**Differential expression of mRNA-seq data.** Genes changing between AOA2 and control lymphoblastoid cell lines were tested in paired fashion. Significant genes were thresholded based on a Benjamini-Hochberg FDR  $\leq 0.05$ , absolute fold-change  $\geq 1.5$  and a minimum normalized read count  $> 10$  in either the AOA2 or control samples. Data were rlog transformed for heatmap visualization, providing variance shrinkage and normalizing with respect to library size. The heatmap showing 4 AOA2 LCLs was additionally scaled by taking gene-wise z-scores. Genes changing between human HAP1 WT and  $\Delta SETX$  samples were assessed using an absolute fold change  $> 1.5$ , together with a normalized read count  $> 10$  in either the  $\Delta SETX$  or WT sample. The top 10 largest changing genes in each direction were used for heatmap visualization. Genes changing between mouse *Setx*<sup>+/+</sup> and *Setx*<sup>-/-</sup> MEFs were assessed using an absolute fold change  $> 2$ , together with a normalized read count  $> 30$ . The top 10 largest changing genes in each direction were used for heatmap visualization.

**Gene Set Enrichment Analysis.** Pre-ranked Gene Set Enrichment Analysis (GSEA) analysis was conducted using Bioconductor's "fgsea" package against the Gene Ontology: Biological Process gene collection defined in the Bioconductor package org.Hs.eg.db. Entrez Gene IDs were used for gene-term mappings. Gene sets containing  $< 100$  or  $> 500$  genes were discarded prior to testing. Genes not associated with an Entrez gene ID were discarded prior to testing. Genes were ranked on the Wald test statistic from the differential expression analysis. Results were thresholded using a Benjamini-Hochberg adjusted pvalue  $< 0.05$ .

**Overlap test.** Permutation-based overlap tests were performed to assess whether human and mouse CNCs, gains and losses, were enriched for various fragile sites and/or genic regions. Gains and losses were considered independently and the analysis was restricted to the autosomes. Each gains/loss list was permuted 1000 times by assigning random genomic windows in either the hg19 (human) or mm9 (mouse) genome, with sizes equal to the original regions. These permuted windows were not permitted to overlap gaps in the reference genome, overlap each other, or overlap regions in the original gains/losses list. The permutations were then compared to each fragile site list or gene list, and the total number of overlapping base pairs determined. The number of overlapping base pairs between the true regions and the list of interest was compared to the permutation distribution by calculating a z-score and an associated two-tailed p-value. Overlap tests were also carried out to determine if gains and losses were associated with upregulated and downregulated genes. The locations of differentially regulated genes for both human and mouse were determined by comparison with the hg19 and mm9 NCBI RefSeq databases (19). For humans, 1250/1310 upregulated genes and 1046/1089 downregulated genes were identified, and for mouse, 666/684 upregulated genes and 458/470 downregulated genes. The locations were then used as the basis for overlap testing versus the gain/loss regions.

**Alignment of ChIP-seq data.** Single-end reads (75 bp) were aligned to the hg19 genome assembly using BWA-MEM 0.7.15 (17) with default settings. BAM files were sorted and indexed using SAMtools 1.3.1 (17). Duplicate reads were marked using Picard 2.1.1 (<http://broadinstitute.github.io/picard>).

**Peak calling.** RNAPII peaks from individual HAP1 WT and  $\Delta$ SETX replicate samples were called against their respective input controls using MACS2 2.1.1 software (20) with the following command line options: '-g hs -q 0.05 -m 5,50'. Peak sets were thresholded for significance based on a q-value  $\leq 0.01$  and a fold enrichment  $\geq 5$ , before taking the intersect of regions common to both WT or  $\Delta$ SETX biological replicates. Peaks were further restricted to a set within +/- 500 bp of a Refseq gene's TSS.

**Meta-gene profiles.** Meta-gene profiles of RNAPII coverage were created using ngs.plot software (21) using standard Ensembl protein-coding gene definitions,  $n = 20,242$ . Coverage is represented as Read count Per Million mapped reads (RPM).

**Traveling ratios.** Travelling ratios were calculated as described (22). Briefly, each transcript was divided into: i) a promoter-proximal bin -30 bp to +300 bp around its TSS and ii) a gene body bin to the TTS. The traveling ratio is the ratio of RNAPII density in the promoter-proximal bin to that in the gene body. The most abundant transcript based on mean promoter RPKM across all samples was taken to be representative of the gene and all other transcripts were discarded. Transcripts for which a travel ratio was calculated to be zero (i.e. no reads in the promoter) or infinite (i.e., no reads in the gene body) in any of the samples were removed from the analysis,  $n = 20,265$  transcripts (genes). An additional pre-filter, limiting the analysis to transcripts with a significant RNAPII peak (see peak calling) over their TSS leaving  $n = 10,132$  transcripts (genes).

**Ratio of traveling ratios.** The ratio of traveling ratios (RoTR) was defined as the traveling ratio over a specific transcript for an RNAPII sample, divided by the traveling ratio of its respective control on the same transcript. Transcripts were limited to genes with i) a WT or  $\Delta$ SETX RNAPII promoter peak, ii)  $\geq 2$ kb distant from a neighboring gene on the same strand, and iii) between 2kb and 300kb in width. The most abundant transcript based on mean promoter RPKM across all samples was taken to be representative of the gene and all other transcripts were discarded. For the purposes of visualization, transcripts for which a travel ratio was calculated to be zero (i.e., no reads in promoter) or infinite (i.e., no reads in gene body) in any of the samples were removed from the analysis, leaving 7,492 transcripts (genes). Genes were stratified into width categories based on the quantiles of the gene width distribution: short: <20%, medium: 40-60% and long: >80%. A Wilcoxon rank sum test was used to assess the significance of differences between RoTR distributions.

**GCskew.** GCskew (strand asymmetry in the distribution of guanines and cytosines) was calculated around the TSS (+/- 400 bp) of the 7492 genes identified in the RoTR analysis as follows:  $GC\ skew = (G - C)/(G + C)$

**Base composition.** The proportion of each base was calculated around the TSS (+/- 400bp or -800 to +400bp) of the 7492 genes identified in the RoTR analysis at single bp resolution. GC-content was calculated as the percentage of the nucleotides that possess either "G" or "C" bases. GCskew was calculated as described. Where appropriate a loess curve was fitted to the data.

**BigWig files.** BigWig files representing genome-wide read depth coverage were generated from BAM alignment files using BEDtools' genomeCoverageBed function (23). BedGraph files were in turn converted to bigWig format using the bedGraphToBigWig function from the KentTools package (24). Genome browser profiles were generated using the UCSC browser.

**SI Appendix, Table S1**

| Reagent/Resource                                        | Reference or Source                                                                            | Identifier or Catalog Number |
|---------------------------------------------------------|------------------------------------------------------------------------------------------------|------------------------------|
| <b>Experimental models</b>                              |                                                                                                |                              |
| Human: AOA2-P1 Fibroblast (also known as SETX-1RM)      | AOA2 patient fibroblast with homozygous <i>SETX</i> mutation, c.6106+3393_7101-22del20648ins25 | (25)                         |
| Human: AOA2-P1 LCL (LCL related to SETX-1RM)            | AOA2 patient LCL with homozygous <i>SETX</i> mutation, c.6106+3393_7101-22del20648ins25        | (26)                         |
| Human: AOA2-P1.1 LCL (also known as SETX-2RM)           | AOA2 patient LCL with homozygous <i>SETX</i> mutation, c.7199+5G>A                             | (25, 26)                     |
| Human: AOA2-P2 LCL (Also known as P2062)                | AOA2 patient LCL with compound heterozygous <i>SETX</i> mutation, c.7240C>T; c.7626delG        | (27, 28)                     |
| Human: AOA2-P3 LCL (also known as IT1)                  | AOA2 patient LCL with homozygous <i>SETX</i> mutation, c.3466delG                              | (26, 29)                     |
| Human: AOA2-P4 LCL (also known as EM594)                | AOA2 patient LCL with homozygous <i>SETX</i> mutation, c.1669C>T                               | (30)                         |
| Human: CTRL-C1 Fibroblast (also known as NFF)           | Control for AOA2-P1 fibroblast                                                                 | (25, 26)                     |
| Human: CTRL-C1 LCL                                      | Age- and sex-matched control for AOA2-P1 LCL                                                   | (25, 26)                     |
| Human: CTRL-C1.1 LCL                                    | Age- and sex-matched control for AOA2-P1.1 LCL                                                 | (25, 26)                     |
| Human: CTRL-C2 LCL                                      | Age- and sex-matched control for AOA2-P2 LCL                                                   | (27, 28)                     |
| Human: CTRL-C3 LCL                                      | Age- and sex-matched control for AOA2-P3 LCL                                                   | (26, 29)                     |
| Human: CTRL-C4 LCL (also known as CR26)                 | Age- and sex-matched control for AOA2-P4 LCL                                                   | (30)                         |
| Human: CS (also known as CS1AN <sub>SV</sub> )          | Jesper Svejstrup Lab                                                                           | (31)                         |
| Human: CS+CSB                                           | Jesper Svejstrup Lab                                                                           | (31)                         |
| Human: HAP1-WT                                          | Horizon Discovery                                                                              | (32)                         |
| Human: HAP1- $\Delta$ <i>SETX</i>                       | This paper                                                                                     | N/A                          |
| Human: MRC5                                             | ATCC                                                                                           | ATCC CCL-171                 |
| Human: MRC5 VA (SV40-transformed)                       | The Francis Crick Institute Cell Services                                                      | N/A                          |
| Human: U2OS-GFP-m53BP1                                  | Jiri Lukas Lab                                                                                 | (33)                         |
| Mouse: C57BL/6J                                         | The Jackson Laboratory                                                                         | Cat#000664                   |
| Mouse: <i>Setx</i> <sup>-/-</sup> knock out in C57BL/6J | Martin Lavin Lab                                                                               | (34)                         |

|                                                               |                                                    |                                   |
|---------------------------------------------------------------|----------------------------------------------------|-----------------------------------|
| Mouse: Mouse Embryonic Fibroblasts <i>Setx</i> <sup>+/+</sup> | This paper                                         | (34)                              |
| Mouse: Mouse Embryonic Fibroblasts <i>Setx</i> <sup>-/-</sup> | This paper                                         | (34)                              |
|                                                               |                                                    |                                   |
| <b>Recombinant DNA</b>                                        |                                                    |                                   |
| pEGFP-hM27RNaseH1                                             | Robert Crouch Lab                                  | (35)                              |
| pEGFP-hM27RNaseH1 <sup>D210N</sup>                            | This paper                                         | N/A                               |
| pSUPER.puro                                                   | OligoEngine                                        | Cat#VEC-PBS-0008                  |
| pX330                                                         | Addgene                                            | Cat#42230                         |
| pX330-sgRNA- <i>SETX</i>                                      | This paper                                         | N/A                               |
|                                                               |                                                    |                                   |
| <b>Antibodies</b>                                             |                                                    |                                   |
| Rabbit polyclonal anti-53BP1                                  | Abcam                                              | Cat#ab36823; RRID: AB_722497      |
| Rabbit polyclonal anti-53BP1                                  | Novus Biologicals                                  | Cat#NB100-304; RRID: AB_10003037  |
| Rabbit polyclonal anti-GFP                                    | Abcam                                              | Cat#ab290; RRID: AB_303395        |
| Rabbit polyclonal anti-γH2AX phospho S139                     | Abcam                                              | Cat#ab2893; RRID: AB_303388       |
| Rabbit polyclonal anti-RPA                                    | Abcam                                              | Cat#ab10359; RRID: AB_297095      |
| Rabbit polyclonal anti- <i>SETX</i>                           | Merck Millipore                                    | Cat#ABN421; RRID: AB_2819063      |
| Rabbit polyclonal anti- <i>SETX</i>                           | Novus Biologicals                                  | Cat#NBP1-94712; RRID: AB_11010824 |
| Rabbit polyclonal anti-XPF                                    | Santa Cruz                                         | Cat#sc-28718; RRID: AB_2277828    |
| Rabbit polyclonal anti-CSB                                    | Bethyl Laboratories                                | Cat#A301-345A; RRID: AB_937843    |
| Mouse monoclonal anti-cyclin A                                | Santa Cruz                                         | Cat#sc-56299; RRID: AB_782328     |
| Mouse monoclonal anti-RAD52                                   | Santa Cruz                                         | Cat#sc-365341; RRID: AB_10851346  |
| Mouse monoclonal anti-RNAPII CTD clone 4H8                    | The Francis Crick Institute                        | N/A                               |
| Mouse monoclonal anti-RNA/DNA hybrids (S9.6)                  | Stephen Leppla lab and the Francis Crick Institute | (36)                              |
| Mouse monoclonal anti-β-tubulin                               | Santa Cruz                                         | Cat#sc-5274; RRID: AB_2288090     |
| Mouse monoclonal anti-XPG clone 8H7                           | The Francis Crick Institute                        | N/A                               |
| Rabbit IgG, polyclonal - negative control                     | Abcam                                              | Cat#ab171870; RRID: AB_2687657    |
| Mouse IgG, polyclonal - negative control                      | Diagenode                                          | Cat#C15400001; RRID: AB_2722553   |



|                                                                  |               |                               |
|------------------------------------------------------------------|---------------|-------------------------------|
| Bridging Antibody for Mouse IgG                                  | Active Motif  | Cat#53017                     |
| Goat anti-mouse Immunoglobulins/HRP                              | Agilent       | Cat#P0447; RRID: AB_2617137   |
| Goat anti-rabbit Immunoglobulins/HRP                             | Agilent       | Cat#P0448; RRID: AB_2617138   |
| Alexa Fluor 488 Goat anti-Rabbit IgG (H+L)                       | ThermoFisher  | Cat#A-11070; RRID: AB_2534114 |
| Alexa Fluor 568 Donkey anti-Mouse IgG (H+L)                      | ThermoFisher  | Cat#A-10037; RRID: AB_2534013 |
|                                                                  |               |                               |
| <b>Oligonucleotides and other sequence-based reagents</b>        |               |                               |
| Primer for ChIP-qPCR: ATP5C1-TSS-Forward: GGCTGTGGCTACCATGTTCT   | Sigma-Aldrich | (37)                          |
| Primer for ChIP-qPCR: ATP5C1-TSS-Reverse: AAGCTCTTCCATCCCTTGC    | Sigma-Aldrich | (37)                          |
| Primer for ChIP-qPCR: ATP5G1-TSS-Forward: GAGACCAAGGGCTAAAGCTG   | Sigma-Aldrich | (37)                          |
| Primer for ChIP-qPCR: ATP5G1-TSS-Reverse: GGGAAATACCCCTCCACACT   | Sigma-Aldrich | (37)                          |
| Primer for ChIP-qPCR: ATRAID-TSS-Forward: ACCAAGGGAACGGAAAATG    | Sigma-Aldrich | (37)                          |
| Primer for ChIP-qPCR: ATRAID-TSS-Reverse: CCGACCTCAAACCTTGCTTCT  | Sigma-Aldrich | (37)                          |
| Primer for ChIP-qPCR: CLSPN-TSS-Forward: GGCTGAGGGAATCAGAGACA    | Sigma-Aldrich | (37)                          |
| Primer for ChIP-qPCR: CLSPN-TSS-Reverse: GGGCGTGTGCATAAACTCA     | Sigma-Aldrich | (37)                          |
| Primer for ChIP-qPCR: COL4A3BP-TSS-Forward: CCGGATTTTCTCTTCCCTTC | Sigma-Aldrich | (37)                          |
| Primer for ChIP-qPCR: COL4A3BP-TSS-Reverse: GAGCGGTGAAGGAAGCCTAC | Sigma-Aldrich | (37)                          |
| Primer for ChIP-qPCR: GADD45A-TSS-Forward: GCCTGTGAGTGAGTGCAGAA  | Sigma-Aldrich | (37)                          |
| Primer for ChIP-qPCR: GADD45A-TSS-Reverse: CGACTCACCTTTCCGGTCTTC | Sigma-Aldrich | (37)                          |
| Primer for ChIP-qPCR: LENG8-TSS-Forward: CGCACTTACGCATGAACATT    | Sigma-Aldrich | (37)                          |
| Primer for ChIP-qPCR: LENG8-TSS-Reverse: AGACTCCGTCTCCGAGAACA    | Sigma-Aldrich | (37)                          |

|                                                                                                  |               |      |
|--------------------------------------------------------------------------------------------------|---------------|------|
| Primer for ChIP-qPCR: PIGH-TSS-Forward:<br>CGCTACTACTCCCCGTCCT                                   | Sigma-Aldrich | (37) |
| Primer for ChIP-qPCR: PIGH-TSS-Reverse:<br>CTCGCAGAGGGTGAAGAGTC                                  | Sigma-Aldrich | (37) |
| Primer for ChIP-qPCR: PMPCA-TSS-Forward:<br>AGCGGAAGTGACGACTGAAG                                 | Sigma-Aldrich | (37) |
| Primer for ChIP-qPCR: PMPCA-TSS-Reverse:<br>ACGGAGCGTCCAGAAAGACT                                 | Sigma-Aldrich | (37) |
| Primer for ChIP-qPCR: PMS2-TSS-Forward:<br>AGCTGAGAGCTCGAGGTGAG                                  | Sigma-Aldrich | (37) |
| Primer for ChIP-qPCR: PMS2-TSS-Reverse:<br>GAGATCGCTGCAACACTGAG                                  | Sigma-Aldrich | (37) |
| Primer for ChIP-qPCR: SMG5-TSS-Forward:<br>CCACACTAAGCGGCTTTACC                                  | Sigma-Aldrich | (37) |
| Primer for ChIP-qPCR: SMG5-TSS-Reverse:<br>AAAATTGCACCCTCCTTCCT                                  | Sigma-Aldrich | (37) |
| Primer for ChIP-qPCR:<br>SNRPD2-TSS-Forward:<br>GGCAGATGTTTTAGGGATGC                             | Sigma-Aldrich | (37) |
| Primer for ChIP-qPCR:<br>SNRPD2-TSS-Reverse:<br>CGCCTTGGCCTACTAAAGTG                             | Sigma-Aldrich | (37) |
| Primer for ChIP-qPCR: SNRPN-Negative Control-Forward:<br>GCCAAATGAGTGAGGATGGT                    | Sigma-Aldrich | (38) |
| Primer for ChIP-qPCR: SNRPN-Negative Control-Reverse:<br>TCCTCTCTGCCTGACTCCAT                    | Sigma-Aldrich | (38) |
| Primer for ChIP-qPCR: THOP1-TSS-Forward:<br>CGCAGGTACCGACTACCC                                   | Sigma-Aldrich | (37) |
| Primer for ChIP-qPCR: THOP1-TSS-Reverse:<br>ATTCATTCCGGCAAACGAGAG                                | Sigma-Aldrich | (37) |
| Primer for mutagenesis:<br>hM27RNaseH1-D210N-<br>Forward:<br>CTGGTTCTGTATACAAACAGT<br>ATGTTTACGA | This paper    | N/A  |
| Primer for mutagenesis:<br>hM27RNaseH1-D210N-<br>Reverse:<br>TCGTAAACATACTGTTTGTAT<br>ACAGAACCAG | This paper    | N/A  |
| sgRNA oligonucleotide targeting<br>SETX: Guide_Top:<br>CACCGCGTTCATGTAGAAGC<br>AAGTA             | This paper    | N/A  |
| sgRNA oligonucleotide targeting<br>SETX: Guide_Bottom:                                           | This paper    | N/A  |

|                                                                |                                 |                             |
|----------------------------------------------------------------|---------------------------------|-----------------------------|
| AACTACTTGCTTCTACATGA<br>ACGC                                   |                                 |                             |
| siRNA: ON-TARGETplus<br>Human SETX siRNA<br>UAGCACAGGUUGUAAUCA | Dharmacon, Horizon<br>Discovery | Cat#J-021420-08-0005        |
| siRNA: ON-TARGETplus Non-<br>targeting Control siRNA #1        | Dharmacon, Horizon<br>Discovery | Cat#D-001810-01-05          |
|                                                                |                                 |                             |
| <b>Chemicals, enzymes and<br/>other reagents</b>               |                                 |                             |
| Acetic acid                                                    | ThermoFisher                    | Cat#10304980                |
| Acetone                                                        | ThermoFisher                    | Cat#10324930                |
| Acetonitrile                                                   | Sigma-Aldrich                   | Cat#271004                  |
| Aminoallyl-dUTP-XX-ATTO-488                                    | Strattech                       | Cat#NU-803-XX-488-L-<br>JEN |
| Aminoallyl-dUTP-ATTO-425                                       | Strattech                       | Cat# NU-803-425-L-JEN       |
| Aminoallyl-dUTP-Cy3                                            | Strattech                       | Cat#NU-803-CY3-L-JEN        |
| Aminoallyl-dUTP-CY5                                            | Strattech                       | Cat#NU-803-CY5-L-JEN        |
| Aminoallyl-dUTP-Texas Red                                      | Strattech                       | Cat#NU-803-TXR-L-JEN        |
| Ampicillin sodium salt                                         | Sigma-Aldrich                   | Cat#A0166                   |
| Colcemid                                                       | Roche                           | Cat#10295892001             |
| cOmplete, Mini, EDTA-free<br>Protease Inhibitor Cocktail       | Roche                           | Cat#11836170001             |
| Cordycepin 5'-triphosphate<br>sodium salt                      | Sigma-Aldrich                   | Cat#C9137                   |
| Cot-I Human DNA                                                | Agilent                         | Cat#5190-3393               |
| Cot-I Mouse DNA                                                | ThermoFisher                    | Cat#18440016                |
| Cytochalasin B                                                 | Sigma-Aldrich                   | Cat#C6762                   |
| Deoxynucleotide (dNTP)<br>Solution Mix                         | NEB                             | Cat# N0447L                 |
| Dextran Sulfate                                                | Merck Millipore                 | Cat#S4030                   |
| DNase I, RNase-free                                            | Roche                           | Cat#4716728001              |
| Ethanol                                                        | ThermoFisher                    | Cat#10048291                |
| Ethanol (absolute)                                             | Sigma-Aldrich                   | Cat#E7023                   |
| Fetal Bovine Serum                                             | Sigma-Aldrich                   | Cat#F2442                   |
| Fetal Bovine Serum                                             | Sigma-Aldrich                   | Cat#F7524                   |
| Formaldehyde solution                                          | Sigma-Aldrich                   | Cat#F8775                   |
| Formamide                                                      | Sigma-Aldrich                   | Cat#47671                   |
| Gibco DMEM medium                                              | ThermoFisher                    | Cat#11995073                |
| Gibco DMEM, no phenol red                                      | ThermoFisher                    | Cat#21063029                |
| Gibco IMDM medium                                              | ThermoFisher                    | Cat#21980065                |
| Gibco Opti-MEM Medium                                          | ThermoFisher                    | Cat#31985062                |
| Gibco RPMI 1640 Medium                                         | ThermoFisher                    | Cat#21875034                |
| Glycine                                                        | Sigma-Aldrich                   | Cat#G8898                   |
| Hydrogen peroxide solution                                     | Sigma-Aldrich                   | Cat#H1009                   |

|                                                  |                 |                                                                                                                             |
|--------------------------------------------------|-----------------|-----------------------------------------------------------------------------------------------------------------------------|
| Immobilon-P PVDF Membrane                        | Merck Millipore | Cat# IPVH00010                                                                                                              |
| Invitrogen NuPAGE 3-8% Tris-Acetate Protein Gels | ThermoFisher    | Cat#EA0378BOX                                                                                                               |
| Invitrogen NuPAGE 4-12% Bis-Tris Protein Gels    | ThermoFisher    | Cat# NP0321BOX                                                                                                              |
| iQ SYBR Green Supermix                           | Bio-Rad         | Cat#170-8884                                                                                                                |
| Kanamycin Monosulphate                           | Formedium       | Cat#KAN0025                                                                                                                 |
| L-Glutamine                                      | ThermoFisher    | Cat#25030024                                                                                                                |
| Methanol                                         | ThermoFisher    | Cat#10396090                                                                                                                |
| Penicillin-Streptomycin                          | Sigma-Aldrich   | Cat#P4333                                                                                                                   |
| Phenol:Chloroform, pH 4.5                        | ThermoFisher    | Cat#AM9722                                                                                                                  |
| PhosSTOP                                         | Roche           | Cat#4906837001                                                                                                              |
| Pierce 16% Formaldehyde, Methanol-free           | ThermoFisher    | Cat#28908                                                                                                                   |
| ProLong Gold Antifade Mountant with DAPI         | ThermoFisher    | Cat#P36935                                                                                                                  |
| Propidium Iodide                                 | Sigma-Aldrich   | Cat#P4864                                                                                                                   |
| Protein G Magnetic Beads                         | Active Motif    | Cat#53033                                                                                                                   |
| Proteinase K                                     | Sigma-Aldrich   | Cat#P4850                                                                                                                   |
| Restriction Enzymes                              | NEB             | <a href="https://www.neb.uk.com/">https://www.neb.uk.com/</a>                                                               |
| RNase A                                          | Qiagen          | Cat#19101                                                                                                                   |
| RNase A                                          | ThermoFisher    | Cat#EN0531                                                                                                                  |
| RNase H                                          | NEB             | Cat#M0297L                                                                                                                  |
| SlowFade Gold Antifade Mountant with DAPI        | ThermoFisher    | Cat#S36939                                                                                                                  |
| Stabilization and Drying Solution                | Agilent         | Cat#5185-5979                                                                                                               |
|                                                  |                 |                                                                                                                             |
| <b>Software</b>                                  |                 |                                                                                                                             |
| Adobe Illustrator CC                             | Adobe           | <a href="https://www.adobe.com/uk/products/illustrator.html">https://www.adobe.com/uk/products/illustrator.html</a>         |
| Adobe Photoshop CC                               | Adobe           | <a href="https://www.adobe.com/uk/products/photoshop.html">https://www.adobe.com/uk/products/photoshop.html</a>             |
| Agilent Cytogenomics 2.7.11.0                    | Agilent         | <a href="https://www.agilent.com/en/genomics-software-downloads">https://www.agilent.com/en/genomics-software-downloads</a> |
| Agilent Feature Extraction 12.0.0.7              | Agilent         | <a href="https://www.agilent.com/en/genomics-software-downloads">https://www.agilent.com/en/genomics-software-downloads</a> |
| Agilent Genomic Workbench 7.0.4.0                | Agilent         | <a href="https://www.agilent.com/en/genomics-software-downloads">https://www.agilent.com/en/genomics-software-downloads</a> |
| BEDtools                                         | (23)            | <a href="https://bedtools.readthedocs.io/en/latest/">https://bedtools.readthedocs.io/en/latest/</a>                         |
| BWA-MEM v0.7.15                                  | (17)            | <a href="http://bio-bwa.sourceforge.net/">http://bio-bwa.sourceforge.net/</a>                                               |

|                                   |                          |                                                                                                                                                     |
|-----------------------------------|--------------------------|-----------------------------------------------------------------------------------------------------------------------------------------------------|
| DAVID Bioinformatics Resources    | (39)                     | <a href="https://david.ncicrf.gov/">https://david.ncicrf.gov/</a>                                                                                   |
| DESeq2 v1.12.3                    | (18)                     | <a href="https://bioconductor.org/packages/release/bioc/html/DESeq2.html">https://bioconductor.org/packages/release/bioc/html/DESeq2.html</a>       |
| FlowJo v9.9                       | Tree Star, Inc.          | <a href="https://www.flowjo.com/solutions/flowjo/downloads">https://www.flowjo.com/solutions/flowjo/downloads</a>                                   |
| Ggbio 1.20.1                      | (7)                      | <a href="https://bioconductor.org/packages/release/bioc/html/ggbio.html">https://bioconductor.org/packages/release/bioc/html/ggbio.html</a>         |
| GREAT v4.0.4                      | (1)                      | <a href="http://great.stanford.edu/">http://great.stanford.edu/</a>                                                                                 |
| IDEAS v6.2                        | Amnis Corporation        | N/A                                                                                                                                                 |
| ImageJ32                          | NIH                      | <a href="https://imagej.nih.gov/ij/">https://imagej.nih.gov/ij/</a>                                                                                 |
| INSPIRE                           | Amnis Corporation        | N/A                                                                                                                                                 |
| KentTools                         | (24)                     | <a href="http://hgdownload.soe.ucsc.edu/admin/exe/">http://hgdownload.soe.ucsc.edu/admin/exe/</a>                                                   |
| MACS2 v2.1.1                      | (20)                     | <a href="https://github.com/taoliu/MACS">https://github.com/taoliu/MACS</a>                                                                         |
| MiSigDB                           | (40, 41)                 | <a href="http://www.broadinstitute.org/gsea/msigdb/">http://www.broadinstitute.org/gsea/msigdb/</a>                                                 |
| Ngs.plot                          | (21)                     | <a href="https://github.com/shenlab-sinai/ngsplot">https://github.com/shenlab-sinai/ngsplot</a>                                                     |
| Picard v2.1.1                     | Broad Institute          | <a href="http://broadinstitute.github.io/picard">http://broadinstitute.github.io/picard</a>                                                         |
| R/Bioconductor                    | Bioconductor             | <a href="https://www.bioconductor.org/">https://www.bioconductor.org/</a>                                                                           |
| RSEM v1.2.31                      | (16)                     | <a href="https://github.com/deweylab/RSEM">https://github.com/deweylab/RSEM</a>                                                                     |
| SAMtools v1.3.1                   | (17)                     | <a href="http://samtools.sourceforge.net/">http://samtools.sourceforge.net/</a>                                                                     |
| SimplePCI 6 Imaging Software      | Hamamatsu Corporation    | N/A                                                                                                                                                 |
| SmartCapture software             | Digital Scientific       | <a href="http://dsuk.biz/DSUK/Downloads.html">http://dsuk.biz/DSUK/Downloads.html</a>                                                               |
| SmartType Karyotyper Software     | Digital Scientific       | <a href="http://dsuk.biz/DSUK/Downloads.html">http://dsuk.biz/DSUK/Downloads.html</a>                                                               |
| STAR v2.5.1b                      | (15)                     | <a href="https://github.com/alexdobin/STAR">https://github.com/alexdobin/STAR</a>                                                                   |
| UCSC Genome Browser               | University of California | <a href="https://genome.ucsc.edu/">https://genome.ucsc.edu/</a>                                                                                     |
| Volocity v6.3                     | PerkinElmer              | <a href="http://cellularimaging.perkinelmer.com/downloads/details.php?id=14">http://cellularimaging.perkinelmer.com/downloads/details.php?id=14</a> |
|                                   |                          |                                                                                                                                                     |
| <b>Other</b>                      |                          |                                                                                                                                                     |
| ChIP-IT Express Kit               | Active Motif             | Cat#53008                                                                                                                                           |
| Chromatin IP DNA Purification Kit | Active Motif             | Cat#58002                                                                                                                                           |
| DNeasy Blood & Tissue Kit         | Qiagen                   | Cat#69506                                                                                                                                           |

|                                                        |               |                 |
|--------------------------------------------------------|---------------|-----------------|
| FL-Ovation cDNA Biotin Module v2                       | NuGEN         | Cat#4200-60     |
| GeneChip Human Gene 1.0 ST Array                       | Affymetrix    | Cat#901087      |
| GenomePlex Complete Whole Genome Amplification Kit     | Sigma-Aldrich | Cat# WGA2       |
| GenomePlex WGA Reamplification Kit                     | Sigma-Aldrich | Cat# WGA3       |
| Hard-Shell Thin-Wall 96-Well Skirted PCR Plates        | Bio-Rad       | Cat#HSP-9655    |
| Hybridization Chamber Kit - SureHyb enabled, Stainless | Agilent       | Cat#G2534A      |
| Hybridization Gasket Slide Kit                         | Agilent       | Cat#G2534-60002 |
| Invitrogen Lipofectamine 2000                          | ThermoFisher  | Cat#11668019    |
| Invitrogen Lipofectamine RNAiMAX                       | ThermoFisher  | Cat#13778150    |
| Microseal 'B' Adhesive Seals                           | Bio-Rad       | Cat#MSB-1001    |
| Nunc Lab-Tek Chambered Coverglass                      | ThermoFisher  | Cat#155380PK    |
| Oligo aCGH/ChIP-on-chip Hybridization Kit              | Agilent       | Cat#5188-5220   |
| Oligo aCGH/ChIP-on-chip Wash Buffer Kit                | Agilent       | Cat#5188-5226   |
| Quikchange Site-Directed Mutagenesis Kit               | Agilent       | Cat#210513      |
| RNeasy Mini Kit                                        | Qiagen        | Cat#74104       |
| SurePrint G3 Human CGH 2x400K Microarray               | Agilent       | Cat#G4448A      |
| SurePrint G3 Mouse CGH 1x1M Microarray                 | Agilent       | Cat#G4838A      |
| SureTag Complete DNA Labeling Kit                      | Agilent       | Cat#5190-4240   |
| TruSeq Stranded mRNA Library Prep Kit                  | Illumina      | Cat#20020595    |
| QIAamp DNA Mini Kit                                    | Qiagen        | Cat#51304       |
| QIAfilter Plasmid Midi Kit                             | Qiagen        | Cat#12243       |
| QIAprep Spin Miniprep Kit                              | Qiagen        | Cat#27106       |
| QIAquick PCR Purification Kit                          | Qiagen        | Cat#28106       |
| WT-Ovation Pico RNA Amplification system               | NuGen         | Cat#3300-12     |
|                                                        |               |                 |

## References

1. McLean CY, *et al.* (2010) GREAT improves functional interpretation of cis-regulatory regions. *Nat. Biotechnol.* 28:495-501.
2. Team RC (2008) R: A language and environment for statistical computing. in *R Foundation for Statistical Computing*.
3. Carvalho BS & Irizarry RA (2010) A framework for oligonucleotide microarray preprocessing. *Bioinformatics* 26:2363-2367.
4. Gautier L, Cope L, Bolstad BM, & Irizarry RA (2004) Affy-analysis of Affymetrix GeneChip data at the probe level. *Bioinformatics* 20:307-315.
5. Smyth GK (2005) limma: Linear models for microarray data. *Bioinformatics and Computational Biology Solutions Using R and Bioconductor. Statistics for Biology and Health*, eds Gentleman RC, Carey VJ, Huber W, & Irizarry RA (Springer, New York), pp 397-420.
6. Benjamini Y & Hochberg Y (1995) Controlling the false discovery rate: A practical and powerful approach to multiple testing. *J. Royal. Stat. Soc. Series B* 57:289-300.
7. Yin T, Cook D, & Lawrence M (2012) ggbio: an R package for extending the grammar of graphics for genomic data. *Genome Biol.* 13:R77.
8. Helmrich A, Stout-Weider K, Hermann K, Schrock E, & Heiden T (2006) Common fragile sites are conserved features of human and mouse chromosomes and relate to large active genes. *Genome Res.* 16:1222-1230.
9. Bignell GR, *et al.* (2010) Signatures of mutation and selection in the cancer genome. *Nature* 463:893-898.
10. Fungtammasan A, Walsh E, Chiaromonte F, Eckert KA, & Makova KD (2012) A genome-wide analysis of common fragile sites: what features determine chromosomal instability in the human genome? *Genome Res.* 22:993-1005.
11. Barlow JH, *et al.* (2013) Identification of early replicating fragile sites that contribute to genome instability. *Cell* 152:620-632.
12. Crosetto N, *et al.* (2013) Nucleotide-resolution DNA double-strand break mapping by next-generation sequencing. *Nat. Methods* 10:361-365.
13. Wei PC, *et al.* (2016) Long neural genes harbor recurrent DNA break clusters in neural stem/progenitor cells. *Cell* 164:644-655.
14. Wei PC, *et al.* (2018) Three classes of recurrent DNA break clusters in brain progenitors identified by 3D proximity-based break joining assay. *Proc. Natl. Acad. Sci. U. S. A.* 115:1919-1924.
15. Dobin A, *et al.* (2013) STAR: ultrafast universal RNA-seq aligner. *Bioinformatics* 29:15-21.
16. Li B & Dewey CN (2011) RSEM: accurate transcript quantification from RNA-Seq data with or without a reference genome. *BMC Bioinformatics* 12:323.
17. Li H, *et al.* (2009) The sequence alignment/map format and SAMtools. *Bioinformatics* 25:2078-2079.
18. Love MI, Huber W, & Anders S (2014) Moderated estimation of fold change and dispersion for RNA-seq data with DESeq2. *Genome Biol.* 15:550.
19. Pruitt KD, *et al.* (2014) RefSeq: an update on mammalian reference sequences. *Nucleic Acids Res.* 42:D756-D763.
20. Zhang Y, *et al.* (2008) Model-based analysis of ChIP-Seq (MACS). *Genome Biol.* 9:R137.
21. Shen L, Shao N, Liu X, & Nestler E (2014) ngs.plot: Quick mining and visualization of next-generation sequencing data by integrating genomic databases. *BMC Genomics* 15:284.
22. Rahl PB, *et al.* (2010) c-Myc regulates transcriptional pause release. *Cell* 141:432-445.
23. Quinlan AR & Hall IM (2010) BEDTools: a flexible suite of utilities for comparing genomic features. *Bioinformatics* 26:841-842.

24. Kent WJ, Zweig AS, Barber G, Hinrichs AS, & Karolchik D (2010) BigWig and BigBed: enabling browsing of large distributed datasets. *Bioinformatics* 26:2204-2207.
25. Suraweera A, *et al.* (2007) Senataxin, defective in ataxia oculomotor apraxia 2, is involved in the defence against oxidative DNA damage. *J. Cell. Biol.* 177:969-979.
26. Criscuolo C, *et al.* (2006) Ataxia with oculomotor apraxia type 2: a clinical, pathologic, and genetic study. *Neurology* 66:1207-1210.
27. Anheim M, *et al.* (2009) Ataxia with oculomotor apraxia type 2: clinical, biological and genotype/phenotype correlation study of a cohort of 90 patients. *Brain* 132:2688-2698.
28. Nanetti L, *et al.* (2013) SETX mutations are a frequent genetic cause of juvenile and adult onset cerebellar ataxia with neuropathy and elevated serum alpha-fetoprotein. *Orphanet. J. Rare Dis.* 8:123.
29. Fogel BL, *et al.* (2014) Mutation of Senataxin alters disease-specific transcriptional networks in patients with ataxia with oculomotor apraxia type 2. *Hum. Mol. Genet.* 23:4758-4769.
30. Airoidi G, *et al.* (2010) Characterization of two novel SETX mutations in AOA2 patients reveals aspects of the pathophysiological role of senataxin. *Neurogenetics* 11:91-100.
31. Wang Y, *et al.* (2014) Dysregulation of gene expression as a cause of Cockayne syndrome neurological disease. *Proc. Natl. Acad. Sci. U. S. A.* 111:14454-14459.
32. Carette JE, *et al.* (2011) Ebola virus entry requires the cholesterol transporter Niemann-Pick C1. *Nature* 477:340-343.
33. Bekker-Jensen S, Lukas C, Melander F, Bartek J, & Lukas J (2005) Dynamic assembly and sustained retention of 53BP1 at the sites of DNA damage are controlled by Mdc1/NFBD1. *J. Cell Biol.* 170:201-211.
34. Becherel OJ, *et al.* (2013) Senataxin plays an essential role with DNA damage response proteins in meiotic recombination and gene silencing. *PLoS Genet.* 9:e1003435.
35. Suzuki Y, *et al.* (2010) An upstream open reading frame and the context of the two AUG codons affect the abundance of mitochondrial and nuclear RNase H1. *Mol. Cell. Biol.* 30:5123-5134.
36. Hu Z, Zhang A, Storz G, Gottesman S, & Leppla SH (2006) An antibody-based microarray assay for small RNA detection. *Nucleic Acids Res* 34:e52.
37. Chen L, *et al.* (2017) R-ChIP using inactive RNase H reveals dynamic coupling of R-loops with transcriptional pausing at gene promoters. *Mol. Cell* 68:745-757.
38. Sanz LA, *et al.* (2016) Prevalent, dynamic and conserved R-loop structures associate with specific epigenomic signatures in mammals. *Mol. Cell* 63:167-178.
39. Huang DW & Lempicki RA (2009) Systematic and integrative analysis of large gene lists using DAVID bioinformatics resources. *Nat. Protoc.* 4:44-57.
40. Liberzon A, *et al.* (2011) Molecular signatures database (MSigDB) 3.0. *Bioinformatics* 27:1739-1740.
41. Subramanian A, *et al.* (2005) Gene set enrichment analysis: a knowledge-based approach for interpreting genome-wide expression profiles. *Proc. Natl. Acad. Sci. U. S. A.* 102:15545-15550.
